# Supplementary material for: Reaction mechanism and kinetics for CO2 reduction on nickel single atom catalysts from quantum mechanics
Source: Springer Nature journal article supplement (doi:10.1038/s41467-020-16119-6), 2020-05-07
Supplement: MOESM3 [file 41467_2020_16119_MOESM3_ESM.pdf]

# **Supplementary Data 1**

## **Optimized Geometries (VASP\_POSCAR format)**

**Reaction Mechanism and Kinetics for CO<sub>2</sub> Reduction on Nickel Single Atom Catalysts  
from Quantum Mechanics**

Hossain et al.

Ni-N<sub>4</sub>-CO<sub>2</sub> (0.5 charge)

1.0000000000000000

9.8400001526000000 0.0000000000000000 0.0000000000000000

-4.9200000763000000 8.5216901053999994 0.0000000000000000

0.0000000000000000 0.0000000000000000 20.0000000000000000

C N O Ni H

27 4 5 1 6

Direct

0.0064163769935362 0.0071586197981824 0.1035922068957283

0.0902116462969320 0.1761257272423610 0.1036392214636662

0.2605586743581300 0.0161480254078426 0.1037177304508602

0.3458861879768601 0.1868282112463150 0.1033267738415773

0.5058114532697332 0.0072556078699804 0.1034159003009788

0.5908937463053230 0.1762051142527649 0.1033994477186325

0.7508112258470164 0.9965258298439331 0.1032202221828076

0.8361077579035455 0.1672144837678718 0.1036690724581916

0.0029693561971985 0.2549146327452855 0.1038734009984488

0.0862244812752698 0.4227161163466295 0.1040869195178519

0.2601082510083999 0.2690016580304244 0.1033602323111062

0.5138802588490968 0.2691083946877222 0.1030708701813871

0.7569630133583745 0.2549242715927668 0.1036396556240682

0.8415032321046622 0.4226983073559098 0.1038656859247369

0.0065904634511461 0.5081543600330167 0.1042495556073506

0.0900977967893497 0.6751634183278349 0.1042726632500786

0.2512103713773710 0.5079280243425482 0.1036422565463140

0.3349787280345102 0.6754483555405838 0.1034275974883284

0.7617391684177988 0.5078800636335445 0.1032693560896156

0.8454981341427603 0.6753622433620527 0.1034022452577981

0.0104598394429953 0.7606149529243083 0.1039808504124156  
0.0937182336240957 0.9284309880647643 0.1038391957317912  
0.2551944558317433 0.7606682514630876 0.1039939094262595  
0.3397402269826110 0.9284906565708291 0.1037131198695245  
0.5828115171020855 0.9143362524035943 0.1029749935422254  
0.8365789898813574 0.9143172154003982 0.1032399198787673  
0.5745896578267594 0.6084811727199517 0.2581276067918990  
0.3366009732882986 0.4319960048944135 0.1031119403014762  
0.6004406565554307 0.4320355923519391 0.1024325687251733  
0.4962655171381727 0.7514029792591466 0.1023085133531539  
0.7600940466769908 0.7513010595441497 0.1029058052452630  
0.6764882266337126 0.5791630998016419 0.2587839433717404  
0.4730339138987218 0.6388408553536440 0.2592430855397449  
0.1705038323917615 0.5271640651339167 0.3317621377174856  
0.2593973460639313 0.7289145608313877 0.4376309534032069  
0.2695542294010573 0.5756950867098565 0.5505579083925259  
0.5483557243276513 0.5916790696591849 0.1021934980600681  
0.2637719855449703 0.5543109721366399 0.3050950568694861  
0.0993437805272141 0.5390566895942704 0.3015810296317673  
0.2238320497454022 0.6565375769291999 0.3984463457906905  
0.1827078194750350 0.7632681004473073 0.4423524521527891  
0.2638937597683311 0.6328270764804771 0.5105439682073108  
0.2716742939146544 0.6385267848982733 0.5885029164757596

N<sub>3</sub>C<sub>1</sub>\_CO<sub>2</sub> (0.5 charge)

1.0000000000000000

9.8400001526000000 0.0000000000000000 0.0000000000000000  
-4.9200000763000000 8.5216901053999994 0.0000000000000000  
0.0000000000000000 0.0000000000000000 20.0000000000000000

C N O Ni H  
28 3 5 1 6

Direct

0.0064928870974856 0.0097144800271822 0.1054147568042236  
0.0904810114035402 0.1789200885281447 0.1054852487104659  
0.2609577518468911 0.0184559794498744 0.1055840400799172  
0.3454773705038991 0.1865927378683978 0.1052623052285411  
0.5052644964791891 0.0091492182187689 0.1053533863734057  
0.5906068352784455 0.1784958474491018 0.1052617825408853  
0.7503214188784624 0.9988974412227553 0.1051662678929333  
0.8352217074337464 0.1689044014725410 0.1054502705506113  
0.0032990911307825 0.2574677354199632 0.1056812940371809  
0.0852355548684861 0.4254238030289514 0.1059200104188677  
0.2603615968883921 0.2699232067457951 0.1053008687148302  
0.5130173851592081 0.2699682394596132 0.1050429294386069  
0.7562672051346498 0.2567261985515203 0.1054243891156344  
0.8401040692549885 0.4252973596876785 0.1056645289746711  
0.0051341602033714 0.5107060135823803 0.1060963871222115  
0.0892552116514422 0.6775138769054664 0.1061540260907865  
0.2505212344445139 0.5119170009585360 0.1055791730420629  
0.3342817004262226 0.6804221520178398 0.1054611844319086  
0.7597309564314659 0.5096536457600638 0.1051944931836740  
0.8453187534553802 0.6788849955217056 0.1053226255613323  
0.0099305679973494 0.7629601196925737 0.1057941819352719  
0.0932351813115219 0.9309783047590214 0.1056274290206701

0.2546610213775602 0.7639531362381060 0.1059472119004146  
0.3399061880099773 0.9311823425450306 0.1056570604643500  
0.5820802913856591 0.9164308783542099 0.1050715272166735  
0.8372895174791487 0.9170450106912706 0.1052084907079157  
0.5776977539863869 0.6116587540583281 0.2624050606700378  
0.3394488710742938 0.4364987655959421 0.1051961644230390  
0.5985965088959455 0.4339982459795210 0.1045937427565491  
0.4944082426481792 0.7535098191690257 0.1047280430840293  
0.7617083673088405 0.7555252629302432 0.1050190794546956  
0.6643419949681223 0.5621943980716688 0.2616486424364620  
0.4918410443849366 0.6623235941674683 0.2653526966577590  
0.1709242316998142 0.5096276475370108 0.3260998569434090  
0.2681210816237449 0.7233529868844654 0.4276036496911578  
0.2553699846783380 0.5671025506389019 0.5431174822934346  
0.5473942510878272 0.5923670691531503 0.1046195267146400  
0.2571047409440148 0.5464087423021925 0.2941440516674653  
0.0822544855149525 0.5008299437851991 0.3007451435775836  
0.2283202789657575 0.6470084554511347 0.3898239172227052  
0.1988487282765797 0.7672598530274526 0.4297381094571002  
0.2593061516180953 0.6265751404999127 0.5021973817245555  
0.2873715167923355 0.6429950855918674 0.5793043146674107

N<sub>2</sub>C<sub>2</sub>CO<sub>2</sub> (0.5 charge)

1.0000000000000000

9.8400001526000000 0.0000000000000000 0.0000000000000000

-4.9200000763000000 8.5216901053999994 0.0000000000000000

0.0000000000000000 0.0000000000000000 20.0000000000000000

C N O Ni H

29 2 5 1 6

Direct

0.0049749819450540 0.0089101769967286 0.1048597220667560  
0.0891085150342263 0.1774031980409630 0.1049944506754270  
0.2598773022049560 0.0180735534558778 0.1048855122638410  
0.3439264305397100 0.1855586252215820 0.1046199873854050  
0.5043896282174670 0.0086686623016519 0.1045881751665830  
0.5897185234141770 0.1776377747821410 0.1044691262752480  
0.7501705993137620 0.0007350929980419 0.1046606510622680  
0.8342111685501190 0.1682396018758470 0.1049677253787710  
0.0024327872594583 0.2566070974627480 0.1052040040226460  
0.0845466079714896 0.4242425322559600 0.1053955517888810  
0.2581945852961600 0.2682529611437300 0.1049593395971020  
0.5123908036813920 0.2692694319284430 0.1041714939339610  
0.7549358841503920 0.2557613159211340 0.1048167697355710  
0.8394477974691340 0.4228005172049980 0.1050482017722560  
0.0050150612207176 0.5098897094103950 0.1055119717306990  
0.0890713067278455 0.6764051720108450 0.1054880645783310  
0.2495869401326590 0.5100875548767549 0.1051602851997370  
0.3342538342623840 0.6794949636063020 0.1048510644489650  
0.7598309051549140 0.5068093451567820 0.1042889100293890  
0.8444797276089280 0.6762166064578000 0.1044680606388230  
0.0095372504271722 0.7620622706037070 0.1050533914349710  
0.0916507518209286 0.9296926641372990 0.1050207127996150  
0.2546510843928120 0.7635134792312210 0.1052564786478600  
0.3391552789056930 0.9305444188874930 0.1048666624791820  
0.5817069884310300 0.9170233252298270 0.1044259504736120  
0.8358910479306020 0.9180232192265270 0.1046823745198110

0.5767182713477370 0.6081701471062080 0.2566081332729550  
0.3375919211966120 0.4343404528155400 0.1050921546116470  
0.7564360913863690 0.7519137397369420 0.1044383046723210  
0.5991366364680319 0.4331551439062910 0.1035296472988850  
0.4949517401035810 0.7531311711638370 0.1040361747067780  
0.6587527835207750 0.5553002953942330 0.2613122645643320  
0.4936321934807070 0.6629119918374400 0.2616512240068760  
0.1671487789013000 0.5294236845672340 0.3171746787157230  
0.2481281349048390 0.7056963144781320 0.4218753518860080  
0.2579935442915800 0.5692442298609490 0.5354881153787050  
0.5470421303808169 0.5931524976758310 0.1048684535112230  
0.2875274916216950 0.5608160411451590 0.2915576811162590  
0.1010012733283790 0.5158210292556050 0.2937876016599790  
0.2146081839635060 0.6415680709137560 0.3785497910202340  
0.1743467337285550 0.7363100558664830 0.4255314353371350  
0.2526252281264550 0.6221594276398080 0.4940838050068520  
0.2806088361859200 0.6419984827831871 0.5716236429855140

Bent\_CO<sub>2</sub>\_Ni-N<sub>4</sub> (0.5 charge)

1.0000000000000000  
9.8400001526000000 0.0000000000000000 0.0000000000000000  
-4.9200000763000000 8.5216901053999994 0.0000000000000000  
0.0000000000000000 0.0000000000000000 20.0000000000000000

C N O Ni H

27 4 5 1 6

Direct

0.0051578215755007 0.0054743063410142 0.1027214123791483

0.0889611292528851 0.1744258145866011 0.1026383602925953  
0.2591853086278296 0.0143460286966311 0.1027784548197710  
0.3445339318313657 0.1849883824110068 0.1023888708178543  
0.5045140493858999 0.0055343307162943 0.1021570070421212  
0.5896615282873884 0.1744360504166145 0.1022910569678326  
0.7495562599679404 0.9948415276564749 0.1021912592847259  
0.8348834851758331 0.1654942406507767 0.1025914236132319  
0.0017522683105929 0.2532321813922294 0.1025904435040743  
0.0850463034812436 0.4210346309119695 0.1022132734607702  
0.2587858791927273 0.2671689732401436 0.1022135086167751  
0.5125218593025254 0.2671520118367053 0.1018478814052613  
0.7557274765369401 0.2531729537958715 0.1023639826424849  
0.8403353311538569 0.4209410865610295 0.1022806790978358  
0.0054175215170276 0.5064805879226734 0.1023975641558313  
0.0889045649065408 0.6734980111470733 0.1024470658076096  
0.2500749786473380 0.5062601192196984 0.1013918502747587  
0.3338655986340835 0.6738384619992041 0.1008929090091587  
0.7604849638647195 0.5060689423430617 0.1014998165627425  
0.8442231672692557 0.6735721453288338 0.1017915838143850  
0.0091625507475635 0.7588412015951164 0.1024986440999177  
0.0923548790083156 0.9266343498421701 0.1028151471250648  
0.2539695040324946 0.7589745397733013 0.1020704686254132  
0.3384706929002990 0.9267606629414581 0.1023847444422500  
0.5815364749776174 0.9126676377434514 0.1013658596794843  
0.8353310113862951 0.9127024351130912 0.1022716369166295  
0.5637527398944562 0.5956276077423143 0.2317010356192140  
0.3351626255769818 0.4300590265631633 0.1013490110081076  
0.5992465524043908 0.4299732869030016 0.1005227491805455

0.4950466742668676 0.7500095865245476 0.0995027722232240  
0.7590596323559973 0.7497092578962417 0.1016974656964815  
0.6684720868028822 0.5725837122840137 0.2419716662275809  
0.4583672669520544 0.6212567863656150 0.2347326510289156  
0.1921939798951599 0.5451332910424803 0.2965775210034955  
0.1819550931126811 0.6849207690124787 0.4079421478450403  
0.2560733912161507 0.5757266639681332 0.5175480344603297  
0.5473070538578859 0.5898462396819749 0.1012816907071443  
0.2976008784924423 0.5616026384908226 0.2867642221564999  
0.1772815490244041 0.6081526431421119 0.2629139003789095  
0.1822561638837396 0.6282594405296306 0.3661287113477476  
0.0749374502591769 0.6639201138246588 0.4135214983654842  
0.2277777151035640 0.6153685945901658 0.4768990323364795  
0.2444727117237607 0.6336182882717637 0.5543864204610796

TS01\_Ni-N<sub>4</sub> (0.5 charge)

1.0000000000000000  
9.8400001526000000 0.0000000000000000 0.0000000000000000  
-4.9200000763000000 8.5216901053999994 0.0000000000000000  
0.0000000000000000 0.0000000000000000 20.0000000000000000

C N O Ni H

27 4 5 1 6

Direct

0.0051290541485151 0.0054632163201125 0.1033396654513052  
0.0885634405183075 0.1744992372782977 0.1033088107162752  
0.2592658576909780 0.0149796535186254 0.1032966392849257  
0.3443151764330437 0.1850368793226067 0.1032933791150871  
0.5039786542203820 0.0053636748138433 0.1031837898466221

0.5895812307630373 0.1743575582301590 0.1030513316747121  
0.7492193658740793 0.9947117176672341 0.1033045962053091  
0.8342185050722550 0.1647466713774061 0.1031272751167414  
0.0012982727136367 0.2527962195708995 0.1028424611106575  
0.0843610836630061 0.4206808893646876 0.1019610269299933  
0.2579025246113780 0.2667406874873211 0.1033047275693343  
0.5124595374528225 0.2665429875939092 0.1028155193772973  
0.7551826785001972 0.2527800264601391 0.1027520074548835  
0.8400223954725725 0.4206214215378076 0.1021654448754483  
0.0050305994567418 0.5063916831101777 0.1019929718938802  
0.0885072665758392 0.6734365960315168 0.1020994022631641  
0.2493728644227284 0.5054071764154836 0.1013196231663396  
0.3338758243114920 0.6744450430978159 0.1012866091291864  
0.7594860074035696 0.5052014978715573 0.1015650944205679  
0.8440588214028739 0.6743765441443175 0.1017797569772933  
0.0091374974492701 0.7590807093482186 0.1024231373373382  
0.0921852210147457 0.9269447031853104 0.1030997905086276  
0.2535463701878240 0.7591422072800735 0.1020652268950890  
0.3383820661119343 0.9269999039364933 0.1029096850118254  
0.5810477217682364 0.9130979581764588 0.1031732225481707  
0.8358050642472812 0.9131977192910331 0.1031661038611961  
0.5539910965207198 0.5888274839983387 0.2103951347189416  
0.3333815196550731 0.4294002626928915 0.1020812249364886  
0.5995682920328473 0.4289940870196229 0.1011652694057984  
0.4938956689838189 0.7504906249892905 0.1018578602349388  
0.7604074764203919 0.7506622164074362 0.1017289338156292  
0.6575964700377495 0.5832993497066800 0.2411025415637149  
0.4310183512498441 0.5927955075290325 0.2357159831332818

0.1335085514821703 0.5410911513274651 0.2987274069733677  
0.1797115355629379 0.6796157709239201 0.4110497121136865  
0.2525641811689282 0.5762797443631995 0.5142507089479150  
0.5469919690889973 0.5899228213466817 0.1122439098611402  
0.4295443369575320 0.5863579202665414 0.2850364740004517  
0.1911125081585843 0.6232139874357195 0.2660364330150222  
0.1532442809789045 0.6002448819337041 0.3449117552782737  
0.0799172247474892 0.6728774904342996 0.4211735919387589  
0.2206483455554814 0.6193163277445877 0.4723938050925170  
0.2455463371086432 0.6346126022860455 0.5519984548894181

Cis-COOH\_Ni-N<sub>4</sub> (1.5 charge)

1.0000000000000000  
9.8400001526000000 0.0000000000000000 0.0000000000000000  
-4.9200000763000000 8.5216901053999994 0.0000000000000000  
0.0000000000000000 0.0000000000000000 20.0000000000000000

C N O Ni H  
27 4 5 1 6

Direct

0.0020691780235861 0.0032077029875218 0.0988009599782199  
0.0851461093431842 0.1718345742523300 0.0994774633210335  
0.2561272504729730 0.0125888245963202 0.0986674256441368  
0.3411618832611362 0.1826041648891200 0.0996176188684470  
0.5007320082580394 0.0030342304875421 0.0993113091294899  
0.5862849642552359 0.1716318863274783 0.0986674145886327  
0.7458846540866649 0.9921090847026764 0.0995214579092432  
0.8308706380220071 0.1620888757514159 0.0985832422140936  
0.9979363239413083 0.2502810065527036 0.0984897577644383

0.0809267201846740 0.4181539685447809 0.0973297998492352  
0.2541922966276186 0.2639922087107189 0.1003984585554931  
0.5094800148696901 0.2637944089757817 0.0988327974606452  
0.7519577833352236 0.2502384799763602 0.0977370640172126  
0.8367949425609367 0.4180715101271986 0.0961119768166572  
0.0017179467940667 0.5038475844235515 0.0957893486665318  
0.0853103125450930 0.6710064040052857 0.0957644421875881  
0.2459874225060980 0.5025855496489608 0.0985321800749670  
0.3308038661317726 0.6721934620523404 0.0983995514139663  
0.7560361576718320 0.5024820863364752 0.0959798505083756  
0.8409618752343657 0.6722938767698615 0.0960733198014684  
0.0061262688193448 0.7567334008935458 0.0962329909467785  
0.0890872641281551 0.9245448674048125 0.0978929429945071  
0.2502047967949258 0.7566518613469628 0.0971620075821031  
0.3350704552677146 0.9244858273369888 0.0983966365292544  
0.5774882258837700 0.9107517709682489 0.1001738764956301  
0.8330776271323472 0.9109742946532098 0.0989249844501404  
0.5646193870327076 0.5881051639406764 0.2097890774107310  
0.3293764715986062 0.4262686369066626 0.1006533272164424  
0.5964273579614253 0.4259167826911617 0.0972723010440261  
0.4904839804362517 0.7485257416265280 0.1003928886023934  
0.7579005460132547 0.7488227244633611 0.0974428368033783  
0.6728944756295020 0.5848374274886102 0.2381136171733992  
0.4473869084242306 0.5931681314750080 0.2431692123065305  
0.1471729593815418 0.6155304825828690 0.2680107460323476  
0.1382765736873895 0.6142303101325602 0.3971167182719404  
0.2463771111460921 0.6024788288869324 0.5118611920385491  
0.5443005090417898 0.5874013850451911 0.1134499167501923

0.4662015166480376 0.5938730971885892 0.2916773518255239  
0.2371386085285866 0.6071876414679607 0.2535533928527553  
0.1485558168631531 0.6142591030117629 0.3200963721623736  
0.0380905833616823 0.6082377480034413 0.4054155975732612  
0.1993960297298080 0.6074175827499857 0.4651312930427064  
0.1787345733641954 0.6118830376165229 0.5446710381251701

Trans-COOH\_Ni-N<sub>4</sub> (1.5 charge)

1.0000000000000000  
9.8400001526000000 0.0000000000000000 0.0000000000000000  
-4.9200000763000000 8.5216901053999994 0.0000000000000000  
0.0000000000000000 0.0000000000000000 20.0000000000000000  
C N O Ni H  
27 4 5 1 6

Direct

0.0024474405511276 0.0029155551911394 0.0951065806466260  
0.0852623974534374 0.1711616979800201 0.0955128008080016  
0.2563899528647458 0.0122054166205069 0.0946469867318570  
0.3413933114171220 0.1821644623024297 0.0959293887399136  
0.5010640571014517 0.0028348111297171 0.0953837876253492  
0.5865237102793490 0.1710336073236780 0.0949570149876861  
0.7461337974730402 0.9916661971077758 0.0960638693973414  
0.8311430194338227 0.1616477106599928 0.0947848343411878  
0.9981384654254902 0.2497954228151661 0.0943052619980509  
0.0810557802914043 0.4176662588740393 0.0923365672621344  
0.2539153993846069 0.2632140907811086 0.0964767113760409  
0.5099660504602505 0.2631215663575184 0.0953366164429008  
0.7522974157496736 0.2498184355616617 0.0938425654101980

0.8370454072618508 0.4176178388746070 0.0917272261215735  
0.0019148730633982 0.5033310869913254 0.0907561519857620  
0.0855506875111244 0.6706350463433574 0.0907236739053777  
0.2461368351868377 0.5018244494482397 0.0936134415855770  
0.3312198005062718 0.6720435775774799 0.0934937869835117  
0.7559669305514178 0.5016814580084890 0.0921236797152251  
0.8411795177906547 0.6721162421240067 0.0922191561866531  
0.0063035601539885 0.7562826572579012 0.0917710862106473  
0.0893485624121636 0.9240769718839809 0.0938753567350954  
0.2503646335107982 0.7562729001457161 0.0921888847180625  
0.3352910150823916 0.9241372187520677 0.0941006968091472  
0.5775806117565522 0.9106934751651135 0.0964347927947430  
0.8337961119101556 0.9107563888693978 0.0955689846716933  
0.5639230112543282 0.5880510153186584 0.2094205734443164  
0.3289034464085372 0.4251066631875017 0.0969067430505795  
0.5967100280123961 0.4247889150418741 0.0943438464033211  
0.4907226033859769 0.7488550033048693 0.0967754876059390  
0.7588468520760578 0.7490317667263349 0.0946163726212847  
0.6681915266221676 0.5788223868416493 0.2386533531056258  
0.4545806944312671 0.6001459481882552 0.2478547832394586  
0.4666353925805568 0.6260168102173737 0.3976963706073268  
0.2012799197297198 0.5624640631120272 0.4486340311062320  
0.2947586363925522 0.6366854294713158 0.5689698485657387  
0.5445036374039661 0.5869489805928468 0.1140690864327272  
0.4545924755496111 0.6125498550275992 0.3493285211656778  
0.3777565380405100 0.6093504108194591 0.2201081077512161  
0.3569746731356653 0.6013472602378112 0.4159702391326954  
0.1745566360948824 0.6392257292053696 0.4323292424339270

0.2525843907330196 0.6062552230400167 0.5194046585955855  
0.2025469145656318 0.5808575335205958 0.5971090855479276

Cis\_COOH\_Ni-N<sub>2</sub>C<sub>2</sub> (charge 1.5)

1.0000000000000000

9.8400001526000000 0.0000000000000000 0.0000000000000000  
-4.9200000763000000 8.5216901053999994 0.0000000000000000  
0.0000000000000000 0.0000000000000000 20.0000000000000000

C N O Ni H

29 2 5 1 6

Direct

0.0027485749044492 0.0026845978947644 0.1005310866511550  
0.0870585548855951 0.1710642113961298 0.1007607351420849  
0.2570198836689609 0.0107927993507016 0.0996123859329767  
0.3416711002577138 0.1788796944819485 0.1016081648006967  
0.5021334788257950 0.0023834395703988 0.0998565485190731  
0.5875557585924638 0.1712012194234786 0.0995635919510718  
0.7480377277180461 0.9947558303678946 0.1019641891580085  
0.8326803824129142 0.1628423504198987 0.0998889018391809  
0.0005324064147389 0.2506408059815006 0.0996031399963917  
0.0828922603239859 0.4183403361346403 0.0976363235592266  
0.2563999696261069 0.2617031291892775 0.1032835004004780  
0.5098662458698350 0.2623248817444893 0.0999331125817597  
0.7530382760868783 0.2496965616432182 0.0985310501005150  
0.8373283986405837 0.4166503803584635 0.0969624546107265  
0.0028718609801011 0.5034195323000579 0.0959741691163137  
0.0868179094550535 0.6702313414460870 0.0958126664525580

0.2481416229395387 0.5046800432865173 0.1000053804791154  
0.3321557510957752 0.6729507065891790 0.0985018085180277  
0.7573389373884343 0.5006319222572040 0.0974429295110066  
0.8414021215737822 0.6689656973564841 0.0989369168173167  
0.0067697883525299 0.7552905362959494 0.0970284924154374  
0.0891814995234043 0.9230215824613481 0.0991953062592093  
0.2523614529665821 0.7569883464490447 0.0971657601371169  
0.3366567230568441 0.9239246542085544 0.0985546188711123  
0.5798406497387534 0.9112697388148639 0.1008845666245526  
0.8333770421795124 0.9119842515468728 0.1029737319962825  
0.5507951514539241 0.5801214308477198 0.2104060029053397  
0.3354150873629798 0.4280987650445670 0.1063196712906311  
0.7542580881062242 0.7456099368144551 0.1053648030713671  
0.5960338040159836 0.4262749229351045 0.0975022693232612  
0.4935327512687217 0.7471080703069299 0.0994851922657681  
0.6273035688117421 0.5361917151363234 0.2430345215814922  
0.4590807556554574 0.6310352685738784 0.2416308242065756  
0.1412347063029765 0.6262018842339969 0.2668472816413532  
0.1306849990402158 0.6269383177562753 0.3941641684580027  
0.2485416005054591 0.5835853813727037 0.4974786924343121  
0.5449744481808472 0.5866964833012221 0.1145471215386662  
0.4712366373234703 0.6245062788034539 0.2902457595621860  
0.2296983346724037 0.6159790957974858 0.2518324383625362  
0.1431283454401043 0.6249909464639938 0.3195287617706719  
0.0181870202366052 0.5690394383749701 0.4019046403149113  
0.1968852418630330 0.6026627415576100 0.4531884373364822  
0.2279015972814763 0.6379672437103429 0.5329935824950521

CO\_Ni-N<sub>4</sub> (1 charge)

1.0000000000000000

9.8400001526000000 0.0000000000000000 0.0000000000000000

-4.9200000763000000 8.5216901053999994 0.0000000000000000

0.0000000000000000 0.0000000000000000 20.0000000000000000

C N O Ni H

27 4 5 1 7

Direct

0.0033292158013244 0.0040751922942495 0.0957879601118834

0.0872317616009018 0.1736717295157806 0.0958151047950694

0.2578056234547652 0.0139602103190822 0.0960928107923721

0.3429667169494597 0.1842239037410354 0.0959415204859115

0.5024504632367424 0.0041258605663919 0.0958564654992288

0.5881699039127103 0.1737021763809811 0.0957081311512114

0.7475706978384729 0.9934044312424445 0.0958245616249515

0.8327109000347563 0.1636887029170561 0.0958427279470079

0.9997465327137605 0.2516905146547306 0.0958926966367144

0.0830838738128637 0.4199233709053526 0.0960416743479332

0.2570025847599716 0.2663349869473330 0.0958247395010206

0.5110059436716371 0.2662865793946950 0.0956813197125018

0.7536926316586694 0.2516764595259829 0.0957415436058788

0.8386186792738365 0.4199056449936969 0.0957927712650267

0.0036147299882358 0.5054596178638002 0.0960725416617650

0.0870431292973481 0.6723266620867177 0.0962231642745296

0.2477973173190634 0.5045604912146286 0.0960095264757678

0.3321137234570419 0.6732084716868727 0.0960980464968601

0.7585132290856132 0.5045203782656539 0.0955532598461381

0.8428059649255195 0.6730982657923477 0.0955849690703977

0.0075035114565636 0.7577836536981145 0.0960102337894322  
0.0907927339250621 0.9259994945155470 0.0959903440692377  
0.2520409345975430 0.7578531911629105 0.0962581802309138  
0.3369425994341108 0.9260604057741321 0.0961105640957632  
0.5794752977069519 0.9113823538384394 0.0958169613147281  
0.8335538440247300 0.9113583692082150 0.0956750355206493  
0.5616930717841970 0.5895619127496147 0.2249290427020907  
0.3328454970327876 0.4290570785728777 0.0956581816270678  
0.5979161142214365 0.4291150034176401 0.0953705531977905  
0.4926322619913611 0.7486825461257035 0.0957123028012535  
0.7576473528368168 0.7485449458060229 0.0953362184818297  
0.6722665512203618 0.5929906583043039 0.2461278130153379  
0.3952767926666873 0.6091766547911236 0.3836719120390140  
0.2931722816930649 0.7695699543824890 0.3016702149658582  
0.1851940798260069 0.8162813268740985 0.4087064914685731  
0.2365585089932554 0.6501945263846076 0.4884617617164071  
0.5453115371396994 0.5888618865787838 0.0976944703385431  
0.3645710373767064 0.6622815235108378 0.3494696750889541  
0.3435749262017253 0.6197242713113957 0.4246899136487041  
0.2069310064956479 0.6943247248673763 0.2740399466591080  
0.2401664076419202 0.7870960192990528 0.3449017835473423  
0.0729412944616412 0.7764783666690280 0.4057525832123979  
0.2111421332843557 0.7225661217279321 0.4558676408831683  
0.3081081141946725 0.7208285201208987 0.5222132012837494

CO\_N<sub>2</sub>C<sub>2</sub> (0.5 charge)

1.0000000000000000

9.8400001526000000 0.0000000000000000 0.0000000000000000  
-4.9200000763000000 8.5216901053999994 0.0000000000000000  
0.0000000000000000 0.0000000000000000 20.0000000000000000

C N O Ni H

29 2 5 1 7

Direct

0.0076983025362158 0.0052505425847635 0.0960050369181828  
0.0920984250939399 0.1735263062254771 0.0960496713900221  
0.2618449091302633 0.0135385888167224 0.0936746697992077  
0.3465202726840158 0.1813916735786479 0.0971935297800810  
0.5071284682295127 0.0050206987531881 0.0938906748653099  
0.5927636826309043 0.1736956465967309 0.0932496312104865  
0.7534555523210602 0.9974568936616822 0.0982305533808771  
0.8380480069692829 0.1653231592219472 0.0941263438094419  
0.0056934500722180 0.2532112157991222 0.0935702215900828  
0.0882647720681051 0.4208152704461232 0.0901450758139218  
0.2611898294366014 0.2638053981014683 0.0992039723628342  
0.5152937295106435 0.2646783783000806 0.0949633696878408  
0.7581196831462552 0.2522307871229150 0.0914492977976008  
0.8423829679736283 0.4187600851769467 0.0885993261860162  
0.0080395476769270 0.5057367047764808 0.0874075847295688  
0.0919249785759972 0.6731504458223597 0.0874086608493265  
0.2538560027619243 0.5073818788450591 0.0938012789326483  
0.3381680612553479 0.6761069358937123 0.0924276797851740  
0.7617207834033876 0.5027425588843737 0.0904223947350395  
0.8459435759547663 0.6714953392863930 0.0924555412458069  
0.0116307351294963 0.7581101525857276 0.0893823012949592  
0.0941898877302267 0.9256851539532422 0.0931380334840484

0.2575427503305173 0.7600620072871334 0.0896270748479627  
0.3418002518263675 0.9265953214992196 0.0918867340523390  
0.5846153422084401 0.9140589008253622 0.0966046470335122  
0.8386743916152145 0.9148845618977837 0.0996997246416149  
0.5449971087277712 0.5752957768888110 0.2072619208000171  
0.3396387613432470 0.4305039402556948 0.1024587038837363  
0.7600882071714413 0.7480149441471778 0.1023555156722775  
0.6014990197865984 0.4281586877835939 0.0937534607315002  
0.4983672652740889 0.7505436617699369 0.0963650250907524  
0.5378952729694598 0.5590905761810739 0.2645174776712464  
0.3919946760004980 0.6095960577792567 0.4256165130326497  
0.2886218260531709 0.7649651805845477 0.3450661217492860  
0.1915106165164433 0.8213613877741548 0.4509806057169886  
0.2411779451709705 0.6582151511913541 0.5320378658734659  
0.5501272225418993 0.5890304761999432 0.1175822584559929  
0.3446018538137859 0.6228579030273811 0.4673922921989556  
0.3590522433008522 0.6622750999127706 0.3918662239276071  
0.1992537451505543 0.6878149980488777 0.3195213295491218  
0.2386808908967577 0.7879015491493504 0.3901480365571936  
0.0796992135183467 0.7840579969130915 0.4488331207715648  
0.2163584637381760 0.7312604971772828 0.4980990084325877  
0.3133598247546819 0.7299610672730487 0.5652568336611650

TS13\_Ni-N<sub>4</sub> (0.8 charge)

1.0000000000000000  
9.8400001526000000 0.0000000000000000 0.0000000000000000  
-4.9200000763000000 8.5216901053999994 0.0000000000000000  
0.0000000000000000 0.0000000000000000 20.0000000000000000

C N O Ni H  
27 4 5 1 7

Direct

-0.0026375630520235 -0.0007172200273011 0.0983015582278175  
0.0812421866277627 0.1688658771557177 0.0983672872597020  
0.2520277209701897 0.0094077568395609 0.0983777267242740  
0.3370971405020158 0.1795327086767402 0.0987723163216025  
0.4964136208728775 -0.0007702391739396 0.0984608793677843  
0.5821770318139062 0.1688464114688894 0.0983549274878307  
0.7415888352125499 0.9885591394252410 0.0988740149563876  
0.8266500492141537 0.1586611592580152 0.0984624369650119  
0.9937525541580247 0.2468432879660456 0.0982078050395148  
0.0770736577536697 0.4150866961857765 0.0978152478936981  
0.2509644154388951 0.2615908502760186 0.0986342374887039  
0.5053015017243623 0.2616206689536972 0.0984830300370060  
0.7476508836659610 0.2467912222855868 0.0981954242171812  
0.8325997745088226 0.4150113207372701 0.0976833821514625  
-0.0023638090479717 0.5006613565875314 0.0975128353754778  
0.0811076179868050 0.6675725083001997 0.0974255186954581  
0.2418802496106672 0.4996263529696036 0.0980728958319614  
0.3263308192029090 0.6685400394422033 0.0980750783228266  
0.7523915852209264 0.4995864198805782 0.0976966307734559  
0.8368451061665471 0.6685378698030464 0.0976782475270268  
0.0016218271857935 0.7531355886266424 0.0976412819992322  
0.0849186495097846 0.9213468563527913 0.0981185911036735  
0.2461105008671189 0.7530975285393477 0.0976523728426142  
0.3309744541867427 0.9212541182868013 0.0981331351849215  
0.5733829196633645 0.9064794589681215 0.0988763506969442

0.8276779472729620 0.9064790111241636 0.0984887332460500  
 0.5747689924380647 0.5901852518153994 0.2340419944244355  
 0.3267808089741595 0.4242200368789347 0.0987086182990350  
 0.5921191952149815 0.4242291300159336 0.0982038492943930  
 0.4865875709534222 0.7438344089148482 0.0989937355177659  
 0.7518383405724959 0.7438361459902211 0.0981255147461225  
 0.7024084174619147 0.6360948959562543 0.2556040535257744  
 0.4525766188284442 0.6176507105103608 0.3012999999615705  
 0.2740902031530204 0.7214290487671937 0.2643693230651541  
 0.1929798694212332 0.8167057280413933 0.3725959371200500  
 0.2001353561511086 0.6566867416582773 0.4822438601138216  
 0.5393492959885302 0.5840551848031713 0.1023671486671128  
 0.5345986044226555 0.6898803770456415 0.3317573562689315  
 0.3497920780942513 0.6802588069595439 0.2787821511579535  
 0.1830755104145739 0.6313119441494520 0.2449164630420600  
 0.2198309443226129 0.7770381153741541 0.3305956388980955  
 0.0886269560845175 0.8016551494252663 0.3651097329181744  
 0.1981634699252279 0.7159565307829294 0.4420609136692066  
 0.2833629104820378 0.7347823932858916 0.5102372302722203

TS23 [1 charge] Ni-N<sub>4</sub>

1.0000000000000000

9.8400001526000000 0.0000000000000000 0.0000000000000000

-4.9200000763000000 8.5216901053999994 0.0000000000000000

0.0000000000000000 0.0000000000000000 20.0000000000000000

C N O Ni H

27 4 5 1 7

Direct

0.0120810148030324 0.0009107598171155 0.0947139948424755  
0.0960069502254142 0.1704873486185230 0.0945502806568753  
0.2667055292658235 0.0108870829089662 0.0944966666003223  
0.3518673595783831 0.1811499191618281 0.0949357155521998  
0.5112293360508701 0.0008542000916258 0.0946108927675113  
0.5969190514715133 0.1704396899686683 0.0946057355056974  
0.7563598148016941 0.9902075530028995 0.0951391045108294  
0.8414592327221684 0.1604424815510721 0.0945676134259706  
0.0084641931160963 0.2484776497377228 0.0942378934393626  
0.0918596223642914 0.4167448375036275 0.0937078659890013  
0.2657895794508161 0.2632358368580566 0.0947266787625983  
0.5200280691450323 0.2632638318514641 0.0947633827112127  
0.7624570920220954 0.2484610216195746 0.0943786723045137  
0.8473682886971164 0.4167054472404364 0.0939083122957285  
0.0123914221440974 0.5022889587575413 0.0934683516107044  
0.0958484417263692 0.6692099269377125 0.0934293983421991  
0.2566294627773154 0.5012542177044423 0.0940055651746490  
0.3409889306133909 0.6699659799136781 0.0941452372253086  
0.7672628174198548 0.5013104989821674 0.0942673746545078  
0.8515906600583789 0.6700411951342981 0.0944516846802342  
0.0163300600272166 0.7547223256313179 0.0939354055178961  
0.0996604678938232 0.9229470305227857 0.0943684445909968  
0.2608767956363741 0.7546190798310940 0.0937283097584501  
0.3457078687344949 0.9228504532983113 0.0942651017708493  
0.5882245228392046 0.9080759953629839 0.0949854604017301  
0.8423409500896666 0.9080624409147561 0.0951179612791914  
0.5591571623339460 0.5680661937625940 0.2413934374954096  
0.3417335081524223 0.4258883352477303 0.0946170760519771

0.6067764059082612 0.4259359530514647 0.0947235474132652  
 0.5015299985001038 0.7452892649459515 0.0951200207232981  
 0.7662978613024325 0.7452725333685174 0.0953220531206080  
 0.6740916054042732 0.6159124522827664 0.2751970975709340  
 0.3942426494293136 0.5072110648148918 0.2956353246147229  
 0.3093177867974433 0.6812778400602255 0.3633599029720259  
 0.2598250134139417 0.8224429567426360 0.4690778496329958  
 0.3690737506466198 0.7320073572311293 0.5757364322036350  
 0.5540205533762464 0.5854931315640260 0.0978970917625215  
 0.3501409916229222 0.6157455735681371 0.3401334855903493  
 0.3114729633732284 0.4667265855341003 0.2619477418829990  
 0.2562940350711710 0.7045559173297550 0.3279510414455113  
 0.2842944200363960 0.7715610474287751 0.4314546753980705  
 0.3204671837179431 0.9347692727846135 0.4604123043566661  
 0.3268624408181747 0.7685926189650503 0.5389528650900463  
 0.3041380334981036 0.7202525714548264 0.6143714035905273

TS13 (1.0 charge) Ni-N<sub>3</sub>C<sub>1</sub> system

1.0000000000000000  
 9.8400001526000000 0.0000000000000000 0.0000000000000000  
 -4.9200000763000000 8.5216901053999994 0.0000000000000000  
 0.0000000000000000 0.0000000000000000 20.0000000000000000  
 C N O Ni H  
 28 3 5 1 7

Direct

0.0056104088228370 0.0050665281061676 0.1005449446913426  
 0.0897132435395745 0.1741201126680818 0.1009816637185093  
 0.2596887340522263 0.0133143501896071 0.1004251211616270

0.3445247807074939 0.1815638363556488 0.1024225297708979  
0.5043872985250056 0.0046315598969453 0.1004084579453215  
0.5897953485087806 0.1735575177743431 0.1004926201114563  
0.7494106485505314 0.9942519884715758 0.1022549155748138  
0.8345531833622585 0.1643110458568360 0.1006379005161063  
0.0026757269830715 0.2529791929995346 0.1000189724732340  
0.0846317874563879 0.4207154493019894 0.0983305665896283  
0.2593120827306422 0.2647776182513267 0.1027433114180803  
0.5119578338166257 0.2645395758684170 0.1017062356848727  
0.7555360000033782 0.2519551687604155 0.0996659872089097  
0.8394810126824072 0.4205330179303050 0.0980283137642031  
0.0043586903935093 0.5057974239157876 0.0970753046098639  
0.0885262830876453 0.6729334763603065 0.0968126685280765  
0.2503646907243527 0.5075804009824123 0.0997990598016248  
0.3338480759093216 0.6760521496240658 0.0993511976895081  
0.7584898415751028 0.5046923610465390 0.0988525048542465  
0.8440247796662391 0.6739882207870884 0.0988373867357404  
0.0090819936719175 0.7581274160536845 0.0977234354851453  
0.0922173286426315 0.9259921829660889 0.0995779149456066  
0.2536412274076150 0.7593853134534531 0.0977678068518692  
0.3387961914536430 0.9262044074780338 0.0993524512620744  
0.5811715240776354 0.9123332518230558 0.1017428375806948  
0.8366808355918287 0.9125775185613443 0.1017044006497951  
0.5696541239868083 0.5898176844114349 0.2180159309622209  
0.3378057854746322 0.4311799525738596 0.1040174550845736  
0.5977299008036293 0.4280485799844200 0.1015440241886486  
0.4929669428777622 0.7498270448744403 0.1020575940471991  
0.7616140373408780 0.7513457505416806 0.1020100644771947

0.6482432270610469 0.5599066868036101 0.2523548024098846  
 0.3768840137058348 0.5534789702247749 0.2794072996999797  
 0.2287375867441497 0.6944911493083314 0.2673960838995691  
 0.2097740338248400 0.8195454762675281 0.3784551571349570  
 0.2247666473254092 0.6616460182234102 0.4862137244818792  
 0.5463114237059736 0.5868933252384128 0.1143638654524286  
 0.4375989039115896 0.5908117097148383 0.3205419328964514  
 0.2959284596098931 0.6317282149774318 0.2720854877916610  
 0.1276505079524857 0.6200922231519221 0.2482158274098534  
 0.2116071477869906 0.7663130428147842 0.3344997701448892  
 0.1126332414282099 0.8228454501864076 0.3778573246768133  
 0.2183294707190901 0.7206517875826932 0.4466986774875874  
 0.2714354011391129 0.7396888757511457 0.5214671731144193

TS13\_Ni-N<sub>2</sub>C<sub>2</sub> (1 charge)

1.0000000000000000  
 9.8400001526000000 0.0000000000000000 0.0000000000000000  
 -4.9200000763000000 8.5216901053999994 0.0000000000000000  
 0.0000000000000000 0.0000000000000000 20.0000000000000000

C N O Ni H

29 2 5 1 7

Direct

0.0075681664647540 0.0028502585984881 0.1005848439501345  
 0.0918318583495176 0.1711656527040165 0.1016471691632067  
 0.2617863635652728 0.0112215457989449 0.0992941365658379  
 0.3461138110654670 0.1787431277157367 0.1028683819595660  
 0.5069418418380400 0.0026660299583631 0.1000432111345821  
 0.5923355537743981 0.1710606451850431 0.0990276713443600

0.7532001362505133 0.9951471205988254 0.1038174663816785  
0.8375230753985113 0.1627127869922261 0.1001921568275803  
0.0056004207366549 0.2509581873307427 0.0999034126265237  
0.0880031868980955 0.4183491599862204 0.0971851263055581  
0.2611548231757457 0.2617326696377837 0.1053139029886419  
0.5149460119754092 0.2621979987757097 0.1002674294957124  
0.7579144150474092 0.2498099561487986 0.0973068956672649  
0.8420673562275927 0.4162311819741434 0.0936845136334325  
0.0080335887078499 0.5034695970451745 0.0933573451311085  
0.0916821467715873 0.6704867109456083 0.0929993715638578  
0.2537551396236820 0.5049439405580853 0.1013491310895318  
0.3378099786148614 0.6735641665046657 0.0995279755169705  
0.7616015224142177 0.5003048435411055 0.0943167901306692  
0.8456978897625875 0.6690363159842250 0.0960632568163959  
0.0116535012408437 0.7557869509295813 0.0938959167161201  
0.0937795275388058 0.9230767286238633 0.0979646604595016  
0.2574712115793351 0.7575674380136195 0.0958908060995838  
0.3414316729323011 0.9240396783851607 0.0979605226214914  
0.5842289742100573 0.9114596359007356 0.1027556079520439  
0.8382806922125472 0.9121937087646993 0.1041409273293005  
0.5829434703536719 0.5691967687973049 0.2111507909898738  
0.3396128554340095 0.4279796680849276 0.1097214463514442  
0.7600679583285702 0.7457309164981892 0.1060192427690177  
0.6009078806845997 0.4254518374863506 0.0980473547143966  
0.4983465495758244 0.7482009754532282 0.1032024966587857  
0.6297257147269620 0.5391113902349501 0.2586806893974133  
0.4143785835980938 0.6473081939199404 0.3270331928470052  
0.2168589456898269 0.7281416556284360 0.2875320845572713

0.1893801476450041 0.8108467544913708 0.4002864934237427  
0.2216629093422320 0.6538734596703926 0.4944451572260909  
0.5511041952005615 0.5866095889056852 0.1230751380377116  
0.3938937841112126 0.6301526239083663 0.3746935932859209  
0.3323207939359162 0.6758125561419664 0.3102189323666361  
0.1189852052763076 0.6362127406388776 0.2744794410464987  
0.1960034830882877 0.7660265490542881 0.3427305642921487  
0.0886830896193694 0.8060195807534549 0.4041463103829500  
0.2080152671339758 0.7186041680987784 0.4564499793946707  
0.2874718094375057 0.7309864156843571 0.5275357692929127
